# Supplementary material for: Risk of loco-regional recurrence and distant metastases of patients with invasive breast cancer up to ten years after diagnosis – results from a registry-based study from Germany
Source: Springer Nature journal article supplement (doi:10.1186/s12885-019-5710-5), 2019-05-30
Supplement: MOESM1 [file 16761012]

**Risk of loco-regional recurrence and distant metastases of patients with invasive breast cancer up to ten years after diagnosis – results from a registry-based study from Germany**

Additional file 1. Studies of the risk of cancer recurrence (loco-regional recurrence and distant metastases) of patients with invasive breast cancer (BRC) cited in clinical practice guidelines (category A), cited in the text presenting results derived from hospital-based samples or otherwise selected populations of patients (B) or presenting results derived from population-based samples (C) of BRC patients

| Category | Origin of study sample | Country                     | Period of diagnosis | N      | Age         | Patient and tumor characteristics                                                                                | Point estimates                                                                                                                               | Reference |
|----------|------------------------|-----------------------------|---------------------|--------|-------------|------------------------------------------------------------------------------------------------------------------|-----------------------------------------------------------------------------------------------------------------------------------------------|-----------|
| A        | clinical trial         | US                          | 1975-1994           | 1031   | ≤ 75 years  | patients with stage II or IIIa tumors treated with mastectomy, chemotherapy and with or without hormonal therapy | 10-year risk of loco-regional recurrence and distant metastases of 17% and 35%                                                                | [4]       |
| A        | hospital               | US                          | 1962-1984           | 433    | All ages    | patients with stage I and II tumors with BCS and RT                                                              | 5-year risk of local recurrence of 8%                                                                                                         | [13]      |
| A        | hospital               | GB                          | 1968-1976           | 603    | All ages    | patients with BCS or mastectomy with or without RT                                                               | 3-year risk of cancer recurrence of 50%                                                                                                       | [14]      |
| A        | hospital               | NL                          | 1984-1997           | 1085   | All ages    | patients with T1 tumors with BCS and RT                                                                          | 5-year risk of cancer recurrence of 29% (≤ 40 years) and 11% (> 40 years)                                                                     | [15]      |
| A        | clinical trial         | US, GB, CA, SE, IT, DE, AT, | 1976-1999           | 10,801 | All ages    | patients with or without RT after BCS                                                                            | 10-year risk of loco-regional recurrence of 35% (BCS) and 19% (BCS + RT)                                                                      | [32]      |
| B        | hospital               | KR                          | 1999-2005           | 1153   | All ages    | patients without distant metastases receiving surgery with or without RT                                         | 5-year risk of cancer recurrence of 12%, 20%, 22% and 20% of patients with luminal A, luminal B, HER2/neu positive and triple negative tumors | [7]       |
| B        | hospital               | NL                          | 2003-2006           | 40,892 | All ages    | patients with T1-3M0 tumors                                                                                      | 5-year risk of local recurrence ranged between 1% and 6%                                                                                      | [35]      |
| B        | health care program    | US                          | 2000-2006           | 234    | 30-90 years | patients with T1N0M0 and HER2/neu positive tumors                                                                | 5-year risk of loco-regional and distant recurrence of 6%                                                                                     | [40]      |
| B        | hospital               | DE                          | 1988-2012           | 16,675 | All ages    | patients receiving mastectomy with or without subsequent RT                                                      | 10-year risk of local recurrence of 9% (mastectomy with RT) and 12% (mastectomy alone)                                                        | [43]      |
| B        | hospital               | US                          | 1998-2011           | 1971   | All ages    | patients with triple negative tumors without distant metastases                                                  | 5-year risk of local and regional recurrence of 4% and 2%                                                                                     | [45]      |

|   |                                                        |    |           |        |             |                                                                                                                                                      |                                                                                                                               |               |
|---|--------------------------------------------------------|----|-----------|--------|-------------|------------------------------------------------------------------------------------------------------------------------------------------------------|-------------------------------------------------------------------------------------------------------------------------------|---------------|
| C | population-based CR                                    | IT | 2003-2005 | 3302   | All ages    | patients without distant metastases                                                                                                                  | 5-year risk of loco-regional recurrence and distant metastases of 4% and 7%                                                   | [42]          |
| C | population-based CR                                    | NL | 2003-2008 | 52,626 | All ages    | Patients without distant metastases and without neoadjuvant treatment                                                                                | 5-year risk of local recurrence, regional recurrence and distant metastases of 3%, 2%, and 9%                                 | [37]          |
| C | population-based CR                                    | NL | 2005-2008 | 2548   | All ages    | patients with triple negative T12N0 tumors without distant metastases with surgery                                                                   | 5-year risk of local recurrence, regional recurrence and distant metastases of 4%, 3% and 12%                                 | [36]          |
| C | population-based CR                                    | NL | 2003-2008 | 1000   | 20-35 years | patients with unilateral tumors without distant metastases and without neoadjuvant treatment who received surgery                                    | 5-year risk of local recurrence, regional recurrence and distant metastases of 4%, 4% and 14%                                 | [38]          |
| C | population-based CR                                    | NL | 2003      | 9342   | All ages    | patients with unilateral stage I-III tumors without involvement of skin or chest wall with local R0 resection without neoadjuvant systemic treatment | proportions of patients with local recurrence, regional recurrence and distant metastases of 4%, 2% and 14% after 10.25 years | [39]          |
| C | population-based CR                                    | CA | 1994-2003 | 588    | < 35 years  | patients who received mastectomy                                                                                                                     | proportions of BRC recurrence of 48% after 8.6 years                                                                          | [41]          |
| C | linkage of different data population-based registries) | DK | 1999-2012 | 23,478 | all ages    | patients with regional or stage II/III breast cancer who                                                                                             | 5-year cumulative incidence of breast cancer recurrence,, visceral and bone metastases of 18%, 5% and 2%                      | [46]          |
| C | population-based CR                                    | DE | 1999-2009 | 9359   | All ages    | patients without distant metastases who received surgery with local R0 resection                                                                     | 10-year risk of loco-regional, distant and overall BRC recurrence of 8%, 11% and 16%                                          | current study |

RT=radiotherapy, BCS=breast conserving surgery, CR=cancer registry, AT=Austria, CA=Canada, DE=Germany, DK=Denmark, GB=United Kingdom, IT=Italy, KR=Republic of Korea, NL=Netherlands, SE=Sweden, US=United States of America.
